# Supplementary material
Source: PubMed Central journal article supplement (PMC3992694)
Supplement: 1400643111_sd01.pdf [file 1400643111_sd01.pdf]

**Dataset S1. Measured and calculated endmember concentrations of dissolved species**

| <u>SITE (depth, location)</u>                    |                  | Mg       | Cl          | pH          | H <sub>2</sub> | H <sub>2</sub> S | ΣCO <sub>2</sub> | CO          | CH <sub>4</sub> | NH <sub>4</sub> <sup>+</sup> | Measured<br>CH <sub>3</sub> SH | Predicted<br>CH <sub>3</sub> SH |        |
|--------------------------------------------------|------------------|----------|-------------|-------------|----------------|------------------|------------------|-------------|-----------------|------------------------------|--------------------------------|---------------------------------|--------|
| Vent (Max. temp. °C)                             |                  | Sample   | (mm)        | (mm)        | (25°C)         | (mM)             | (mM)             | (mm)        | (μM)            | (mM)                         | (μM (±2s))                     | (nM (±2s, n))                   | nmolal |
| <b>RAINBOW (2300m, 36°13.80'N–33°54.15'W)</b>    |                  |          |             |             |                |                  |                  |             |                 |                              |                                |                                 |        |
| <i>Endmember Fluids</i>                          |                  |          |             |             |                |                  |                  |             |                 |                              |                                |                                 |        |
| PP27/Exo2/Padraig/Termitiere<br>(350°C)          | J2-353-IGT-3     | 6.90     | 732         | 3.35        | 10.7           | 2.7              | 19.6             | 4.5         | 1.73            | 1.8(±0.28)                   | 6.7(±0.3, 1)                   | -                               |        |
|                                                  | J2-353-CGT-R     | 7.05     | 728         | 3.59        | 10.6           | 3.0              | 17.8             | 4.4         | 1.76            | 2.9(±0.15)                   | 6.5(±0.3, 1)                   | -                               |        |
|                                                  | <b>Endmember</b> | <b>0</b> | <b>758</b>  | <b>3.35</b> | <b>12.3</b>    | <b>3.3</b>       | <b>21.3</b>      | <b>5.1</b>  | <b>2.01</b>     | <b>2.7</b>                   | <b>7.7</b>                     | <b>8.0x10<sup>2</sup></b>       |        |
| Stylo 1 (367°C)                                  | J2-354-IGT-5     | 4.17     | 746         | 3.31        | 15.0           | 1.9              | 23.4             | 6.6         | 1.95            | 1.9(±0.21)                   | 7.6(±0.8, 4)                   | -                               |        |
|                                                  | J2-354-CGT-B     | 3.92     | 750         | 3.39        | 14.8           | 2.3              | 22.3             | 6.8         | 1.93            | 2.3(±0.23)                   | 6.1(±0.9, 3)                   | -                               |        |
|                                                  | <b>Endmember</b> | <b>0</b> | <b>765</b>  | <b>3.31</b> | <b>16.1</b>    | <b>2.3</b>       | <b>24.6</b>      | <b>7.2</b>  | <b>2.10</b>     | <b>2.3</b>                   | <b>7.4</b>                     | <b>4.0x10<sup>2</sup></b>       |        |
| CMSP&P (365°C)                                   | J2-354-IGT-3     | 3.49     | 751         | 3.36        | 14.8           | 1.8              | 20.6             | 6.9         | 1.91            | 2.0(±0.23)                   | 7.2(±1.0, 3)                   | -                               |        |
|                                                  | J2-354-CGT-Y     | 49.5     | nd          | 6.20        | 1.5            | 0.09             | nd               | 0.4         | 0.18            | 0.74(±0.38)                  | 1.1(±0.1, 3)                   | -                               |        |
|                                                  | <b>Endmember</b> | <b>0</b> | <b>766</b>  | <b>3.36</b> | <b>15.9</b>    | <b>2.0</b>       | <b>21.9</b>      | <b>7.4</b>  | <b>2.05</b>     | <b>2.2</b>                   | <b>7.8</b>                     | <b>3.5x10<sup>2</sup></b>       |        |
| Stylo 2 (X11) (364°C)                            | J2-355-IGT-4     | 3.97     | 743         | 3.12        | 15.4           | 1.8              | 19.7             | 6.3         | 1.94            | 2.4(±0.37)                   | 12.0(±2.4, 3)                  | -                               |        |
|                                                  | J2-355-CGT-R     | 9.11     | 729         | 3.67        | 13.6           | 1.7              | 17.4             | 5.9         | 1.73            | 1.7(±0.09)                   | 5.7(±0.5, 3)                   | -                               |        |
|                                                  | <b>Endmember</b> | <b>0</b> | <b>763</b>  | <b>3.12</b> | <b>16.5</b>    | <b>2.0</b>       | <b>20.9</b>      | <b>7.0</b>  | <b>2.10</b>     | <b>2.4</b>                   | <b>10.3</b>                    | <b>4.0x10<sup>2</sup></b>       |        |
| <i>Low Temperature Fluids</i>                    |                  |          |             |             |                |                  |                  |             |                 |                              |                                |                                 |        |
| Ecurie (191°C)                                   | J2-354-IGT-4     | 33.8     | 631         | 5.05        | 4.8            | 0.6              | 11.2             | 2.7         | 0.88            | 2.4(±0.18)                   | 93.3(±6.2, 4)                  | -                               |        |
|                                                  | J2-354-IGT-8     | 13.2     | <b>717</b>  | <b>3.23</b> | <b>9.4</b>     | <b>1.4</b>       | <b>18.7</b>      | <b>5.9</b>  | <b>1.79</b>     | 2.4(±0.36)                   | <b>223(±11, 3)</b>             | <b>1.3x10<sup>6</sup></b>       |        |
| Mussel Beach (180°C)                             | J2-355-IGT-8     | 7.18     | <b>728</b>  | <b>3.00</b> | <b>13.4</b>    | <b>1.5</b>       | <b>21.8</b>      | <b>7.3</b>  | <b>1.80</b>     | 1.6(±0.14)                   | <b>47.7(±4, 3)</b>             | <b>1.5x10<sup>6</sup></b>       |        |
| Bottom Seawater                                  |                  | 52.5     | 547         | ~8          | 0              | 0                | 2.2              | 0           | 0               | 0.1                          | 0 (nd‡)                        | -                               |        |
| <b>LOST CITY (750m, 30°07.4'N–42°07.2'W)</b>     |                  |          |             |             |                |                  |                  |             |                 |                              |                                |                                 |        |
| <i>Endmember Fluids</i>                          |                  |          |             |             |                |                  |                  |             |                 |                              |                                |                                 |        |
| Poseidon Beehive (94°C)                          | J2-361-CGT-B     | 6.50     | nd §        | 10.2        | 9.1            | 0.21             | nd               | BD          | 0.93            | 3.2(±0.34)                   | 1.6(±0.6, 3)                   | -                               |        |
|                                                  | J2-361-CGT-W     | 2.30     | nd §        | 10.5        | 10.1           | 0.47             | 0.19             | BD          | 1.04            | 3.3(±0.17)                   | 2.5(±1.5, 4)                   | -                               |        |
|                                                  | J2-361-IGT-5     | 1.40     | nd §        | 10.5        | 10.1           | 0.07             | 0.32             | BD          | 1.06            | 3.3(±0.16)                   | 1.4(±0.9, 4)                   | -                               |        |
|                                                  | <b>Endmember</b> | <b>0</b> | <b>nd §</b> | <b>10.2</b> | <b>10.4</b>    | <b>0.27</b>      | <b>0.18</b>      | <b>BD</b>   | <b>1.08</b>     | <b>3.5</b>                   | <b>1.9</b>                     | <b>nd*</b>                      |        |
| Marker 6 (96°C)                                  | J2-362-IGT-4     | 1.23     | nd §        | 10.5        | 10.3           | 0.22             | 0.15             | BD          | 1.10            | 3.4(±0.17)                   | 1.3(±0.4, 3)                   | -                               |        |
|                                                  | <b>Endmember</b> | <b>0</b> | <b>nd §</b> | <b>10.5</b> | <b>10.5</b>    | <b>0.22</b>      | <b>0.10</b>      | <b>BD</b>   | <b>1.13</b>     | <b>3.5</b>                   | <b>1.4</b>                     | <b>nd*</b>                      |        |
| Bottom Seawater                                  |                  | 53.3     | 547         | ~8          | 0              | 0                | 2.2              | 0           | 0               | 0.1                          | 0 (nd‡)                        | -                               |        |
| <b>LUCKY STRIKE (1700m, 37°17.5'N–32°16.7'W)</b> |                  |          |             |             |                |                  |                  |             |                 |                              |                                |                                 |        |
| <i>Endmember Fluids</i>                          |                  |          |             |             |                |                  |                  |             |                 |                              |                                |                                 |        |
| Isabel (292°C)                                   | J2-357-IGT-5     | 2.75     | 490         | 3.81        | 0.032          | 3.5              | 106              | BD          | 0.82            | 5.8(±0.31)                   | 6.1(±1.7, 3)                   | -                               |        |
|                                                  | <b>Endmember</b> | <b>0</b> | <b>487</b>  | <b>3.81</b> | <b>0.034</b>   | <b>3.7</b>       | <b>112</b>       | <b>BD</b>   | <b>0.86</b>     | <b>6.2</b>                   | <b>6.5</b>                     | <b>1.1x10<sup>-2</sup></b>      |        |
| US4 (299°C)                                      | J2-357-IGT-3     | 2.32     | 418         | 3.89        | 0.051          | 3.6              | 127              | BD          | 0.71            | 8.9(±0.45)                   | 5.3(±1.3, 4)                   | -                               |        |
|                                                  | <b>Endmember</b> | <b>0</b> | <b>414</b>  | <b>3.89</b> | <b>0.053</b>   | <b>3.8</b>       | <b>133</b>       | <b>BD</b>   | <b>0.74</b>     | <b>9.3</b>                   | <b>5.6</b>                     | <b>2.6x10<sup>-2</sup></b>      |        |
| Crystal (308°C)                                  | J2-358-IGT-8     | 2.85     | 538         | 4.43        | 0.037          | 3.7              | 110              | BD          | 0.77            | 16.1(±0.80)                  | 23.0(±3.0, 3)                  | -                               |        |
|                                                  | J2-358-CGT-R     | 31.2     | 544         | 4.72        | 0.020          | 2.0              | 48.9             | BD          | 0.33            | 4.2(±0.21)                   | 7.5(±0.9, 4)                   | -                               |        |
|                                                  | <b>Endmember</b> | <b>0</b> | <b>538</b>  | <b>4.43</b> | <b>0.041</b>   | <b>4.1</b>       | <b>117</b>       | <b>BD</b>   | <b>0.82</b>     | <b>16.0</b>                  | <b>23.4</b>                    | <b>4.3x10<sup>-3</sup></b>      |        |
| Medea (270°C)                                    | J2-359-IGT-2     | 4.17     | 552         | 3.81        | 0.060          | 2.5              | 90.3             | BD          | 0.82            | 6.2(±0.52)                   | 5.4(±0.7, 3)                   | -                               |        |
|                                                  | J2-359-CGT-Y     | 3.82     | 553         | 3.90        | 0.056          | 2.9              | 91.2             | BD          | 0.82            | 5.6(±0.28)                   | 5.6(±0.7, 3)                   | -                               |        |
|                                                  | <b>Endmember</b> | <b>0</b> | <b>554</b>  | <b>3.81</b> | <b>0.063</b>   | <b>2.9</b>       | <b>98.0</b>      | <b>BD</b>   | <b>0.89</b>     | <b>6.4</b>                   | <b>5.9</b>                     | <b>3.5x10<sup>-1</sup></b>      |        |
| Bottom Seawater                                  |                  | 52.5     | 547         | ~8          | 0              | 0                | 2.2              | 0           | 0               | 0.1                          | 0 (nd‡)                        | -                               |        |
| <b>TAG (3600m, 26°08'N–44°49'W)</b>              |                  |          |             |             |                |                  |                  |             |                 |                              |                                |                                 |        |
| <i>Endmember Fluids</i>                          |                  |          |             |             |                |                  |                  |             |                 |                              |                                |                                 |        |
| Black Smoker Complex (363°C)                     | J2-363-IGT-5     | 3.93     | nd §        | 3.28        | 0.095          | 4.7              | 4.94             | BD          | 0.13            | 4.0(±0.65)                   | 11.6(±2.5, 3)                  | -                               |        |
|                                                  | J2-363-CGT-R     | 5.93     | nd §        | 4.09        | 0.088          | 4.5              | 4.47             | BD          | 0.13            | 4.4(±0.23)                   | 10.2(±0.5, 2)                  | -                               |        |
|                                                  | <b>Endmember</b> | <b>0</b> | <b>nd §</b> | <b>3.28</b> | <b>0.10</b>    | <b>5.1</b>       | <b>4.97</b>      | <b>BD</b>   | <b>0.14</b>     | <b>4.6</b>                   | <b>12.0</b>                    | <b>5.8x10<sup>-5</sup></b>      |        |
| Bottom Seawater                                  |                  | 52.5     | 547         | ~8          | 0              | 0                | 2.2              | 0           | 0               | 0.1                          | 0 (nd‡)                        | -                               |        |
| <b>9°50'N EPR (2500m, 9°50.3'N–104°17.5'W)</b>   |                  |          |             |             |                |                  |                  |             |                 |                              |                                |                                 |        |
| <i>Endmember Fluids</i>                          |                  |          |             |             |                |                  |                  |             |                 |                              |                                |                                 |        |
| Bio9 (HOBO) (363°C)                              | 4469-IGT-4       | 3.27     | 375         | 3.50        | 0.92           | 10.2             | 86.9             | 1.6         | 0.076           | 3.2(±0.16)                   | 4.3(±0.8, 3)                   | -                               |        |
|                                                  | 4469-IGT-5       | 3.04     | 378         | 3.55        | 0.87           | 11.0             | 86.7             | nd          | 0.075           | 2.3(±0.17)                   | 3.2(±0.3, 3)                   | -                               |        |
|                                                  | <b>Endmember</b> | <b>0</b> | <b>366</b>  | <b>3.50</b> | <b>0.95</b>    | <b>11.3</b>      | <b>92.1</b>      | <b>1.8</b>  | <b>0.081</b>    | <b>2.9</b>                   | <b>4.0</b>                     | <b>2.0</b>                      |        |
| Trick or Treat (Marker 28) (281°C)               | 4469-IGT-1       | 5.73     | 195         | 3.94        | 1.0            | 17.1             | 60.4             | nd          | 0.058           | 1.9(±0.09)                   | 11.1(±3, 3)                    | -                               |        |
|                                                  | 4469-IGT-3       | 2.45     | 169         | 3.83        | 1.2            | 18.3             | 66.1             | 1.9         | 0.066           | 2.5(±0.24)                   | 10.0(±0.8, 3)                  | -                               |        |
|                                                  | <b>Endmember</b> | <b>0</b> | <b>152</b>  | <b>3.83</b> | <b>1.2</b>     | <b>19.2</b>      | <b>68.3</b>      | <b>2.0</b>  | <b>0.067</b>    | <b>2.4</b>                   | <b>11.4</b>                    | <b>4.1x10<sup>3</sup></b>       |        |
| Tica (275°C)                                     | 4464-IGT-1       | 4.08     | 335         | 3.83        | 0.37           | 8.2              | 92.5             | 0.81        | 0.091           | 2.1(±0.15)                   | 3.6(±0.6, 3)                   | -                               |        |
|                                                  | 4464-IGT-6       | 14.4     | 377         | 4.32        | 0.29           | 6.8              | 72.4             | 0.64        | 0.095           | 2.2(±0.44)                   | 2.9(±0.5, 3)                   | -                               |        |
|                                                  | <b>Endmember</b> | <b>0</b> | <b>318</b>  | <b>3.83</b> | <b>0.40</b>    | <b>9.0</b>       | <b>99.3</b>      | <b>0.9</b>  | <b>0.11</b>     | <b>2.6</b>                   | <b>4.0</b>                     | <b>1.8x10<sup>2</sup></b>       |        |
| L Vent (246°C)                                   | 4467-IGT-1       | 4.29     | 567         | 3.83        | 0.72           | 5.2              | 8.81             | 0.20        | 0.071           | 3.1(±0.31)                   | 7.8(±0.4, 2)                   | -                               |        |
|                                                  | 4467-IGT-5       | 8.89     | 559         | 4.31        | 0.70           | 4.6              | 8.18             | 0.18        | 0.070           | 2.6(±0.24)                   | 9.8(±0.6, 3)                   | -                               |        |
|                                                  | <b>Endmember</b> | <b>0</b> | <b>567</b>  | <b>3.83</b> | <b>0.81</b>    | <b>5.6</b>       | <b>9.38</b>      | <b>0.22</b> | <b>0.080</b>    | <b>3.2</b>                   | <b>9.9</b>                     | <b>1.5x10<sup>3</sup></b>       |        |
| L Vent (Marker 8) (221°C)                        | 4468-IGT-4       | 9.11     | 558         | 4.20        | 0.63           | 4.7              | 8.19             | BD          | 0.066           | 4.0(±0.20)                   | 7.5(±0.6, 3)                   | -                               |        |
|                                                  | <b>Endmember</b> | <b>0</b> | <b>562</b>  | <b>4.20</b> | <b>0.75</b>    | <b>5.7</b>       | <b>9.43</b>      | <b>BD</b>   | <b>0.080</b>    | <b>4.9</b>                   | <b>9.0</b>                     | <b>1.3x10<sup>4</sup></b>       |        |

**Dataset S1. (continued)**

| SITE (depth, location)                         |                  | Mg       | Cl         | pH          | H <sub>2</sub> | H <sub>2</sub> S | ΣCO <sub>2</sub> | CO          | CH <sub>4</sub> | NH <sub>4</sub> <sup>+</sup>                  | Measured CH <sub>3</sub> SH                                                      | Predicted CH <sub>3</sub> SH |
|------------------------------------------------|------------------|----------|------------|-------------|----------------|------------------|------------------|-------------|-----------------|-----------------------------------------------|----------------------------------------------------------------------------------|------------------------------|
| Vent (Max. temp. °C)                           | Sample           | (mm)     | (mm)       | (25°C)      | (mM)           | (mM)             | (mm)             | (μM)        | (mM)            | (μM (±2s))                                    | (nM (±2s, n))                                                                    | molal                        |
| <b>9°50'N EPR (continued)</b>                  |                  |          |            |             |                |                  |                  |             |                 |                                               |                                                                                  |                              |
| <i>Low Temperature &amp; Mixed Fluids</i>      |                  |          |            |             |                |                  |                  |             |                 |                                               |                                                                                  |                              |
| L. Vent Fissure (78°C)                         | 4467-IGT-6       | 41.1     | <b>543</b> | <b>5.77</b> | <b>0.028</b>   | <b>1.0</b>       | <b>3.93</b>      | BD          | <b>0.037</b>    | 7.6 (±0.61)                                   | <b>17.8</b> (±1.3, 3)                                                            | <b>7.5x10<sup>3</sup></b>    |
|                                                | 4467-IGT-8       | 49.0     | nd         | 6.43        | 0.013          | nd               | 2.96             | BD          | 0.010           | 1.4 (±0.07)                                   | 6.5 (±0.3, 3)                                                                    | -                            |
| Crab Spa (23°C)                                | 4464-IGT-4       | 50.3     | <b>525</b> | <b>5.74</b> | <b>0.0032</b>  | <b>0.17</b>      | <b>7.26</b>      | BD          | <b>0.010</b>    | 8.6 (±0.72)                                   | <b>6.1</b> (±0.3, 3)                                                             | <b>9.4x10<sup>2</sup></b>    |
|                                                | 4464-IGT-5       | 50.5     | 528        | 5.87        | 0.0028         | 0.19             | 7.26             | BD          | 0.012           | 10.0 (±0.67)                                  | 5.7 (±0.3, 3)                                                                    | -                            |
|                                                | 4466-IGT-3       | 50.0     | 526        | 5.79        | 0.0058         | 0.29             | 7.47             | BD          | 0.009           | 8.7 (±0.44)                                   | 5.9 (±0.3, 1)                                                                    | -                            |
| Bottom Seawater                                |                  | 53.5     | 538        | ~8          | 0              | 0                | 2.18             | 0           | 0               | 0.1                                           | 0 (nd‡)                                                                          | -                            |
| <b>GUAYMAS BASIN (2000m, 27°02'N–111°24'W)</b> |                  |          |            |             |                |                  |                  |             |                 |                                               |                                                                                  |                              |
| <i>Endmember Fluids</i>                        |                  |          |            |             |                |                  |                  |             |                 |                                               |                                                                                  |                              |
| Theme Park (251°C)                             | 4458-IGT-1       | 3.46     | 598        | 5.78        | 0.50           | 6.4              | 43.9             | nd          | 41.5            | 12.3x10 <sup>3</sup> (±0.62x10 <sup>3</sup> ) | 15.3x10 <sup>3</sup> (±0.76x10 <sup>3</sup> , 2)                                 | -                            |
|                                                | 4458-IGT-8       | 31.9     | 564        | 5.73        | 0.23           | 2.8              | 21.1             | nd          | 18.8            | 5.2x10 <sup>3</sup> (±0.26x10 <sup>3</sup> )  | 6.52x10 <sup>3</sup> (±0.80x10 <sup>3</sup> , 3)                                 | -                            |
|                                                | <b>Endmember</b> | <b>0</b> | <b>602</b> | <b>5.73</b> | <b>0.54</b>    | <b>6.8</b>       | <b>47.1</b>      | nd          | <b>44.7</b>     | 13.1x10 <sup>3</sup>                          | <b>16.3x10<sup>3</sup></b>                                                       | <b>nd*</b>                   |
| Cathedral Hill (172°C)                         | 4459-IGT-5       | 41.0     | 555        | 5.73        | 0.12           | 1.8              | 9.85             | 6.3         | 10.3            | 2.8x10 <sup>3</sup> (±0.14x10 <sup>3</sup> )  | 3.49x10 <sup>3</sup> (±0.20x10 <sup>3</sup> , 3)                                 | -                            |
|                                                | <b>Endmember</b> | <b>0</b> | <b>611</b> | <b>5.73</b> | <b>0.52</b>    | <b>7.9</b>       | <b>35.0</b>      | <b>27</b>   | <b>44.2</b>     | 11.8x10 <sup>3</sup>                          | <b>14.9x10<sup>3</sup></b>                                                       | <b>nd*</b>                   |
| Sulfide Spires (218°C)                         | 4461-IGT-5       | 12.9     | 588        | 5.75        | 0.42           | 5.3              | 31.8             | 76          | 32.8            | 10.5x10 <sup>3</sup> (±0.53x10 <sup>3</sup> ) | 12.9x10 <sup>3</sup> (±1.9x10 <sup>3</sup> , 3)                                  | -                            |
|                                                | 4461-IGT-8       | 32.3     | 567        | 4.48        | 0.24           | 2.9              | 21.0             | 26          | 19.3            | 5.4x10 <sup>3</sup> (±0.27x10 <sup>3</sup> )  | 6.14x10 <sup>3</sup> (±0.80x10 <sup>3</sup> , 3)                                 | -                            |
|                                                | <b>Endmember</b> | <b>0</b> | <b>605</b> | <b>4.48</b> | <b>0.56</b>    | <b>7.1</b>       | <b>42.9</b>      | <b>92.4</b> | <b>44.4</b>     | 13.8x10 <sup>3</sup>                          | <b>16.7x10<sup>3</sup></b>                                                       | <b>nd*</b>                   |
| Toadstool (288°C)                              | 4462-IGT-5       | 11.3     | 583        | 6.13        | 2.1            | 6.1              | 41.8             | nd          | 49.7            | 12.7x10 <sup>3</sup> (±0.64x10 <sup>3</sup> ) | 8.5 (±1.0, 2)                                                                    | -                            |
|                                                | 4462-IGT-6       | 2.42     | 595        | 6.09        | 2.6            | 7.9              | 47.6             | nd          | 61.0            | 15.2x10 <sup>3</sup> (±0.76x10 <sup>3</sup> ) | 6.1 (±2.0, 2)                                                                    | -                            |
|                                                | <b>Endmember</b> | <b>0</b> | <b>597</b> | <b>6.09</b> | <b>2.7</b>     | <b>8.0</b>       | <b>50.8</b>      | nd          | <b>63.5</b>     | 16.0x10 <sup>3</sup>                          | <b>8.1</b>                                                                       | <b>nd*</b>                   |
| Rebecca's Roost (299°C)                        | 4462-IGT-1       | 3.12     | 597        | 6.14        | 3.1            | 7.5              | 45.8             | nd          | 54.5            | 14.6x10 <sup>3</sup> (±0.73x10 <sup>3</sup> ) | 14.1 (±0.7, 1)                                                                   | -                            |
|                                                | 4462-IGT-4       | 5.64     | 592        | 6.09        | 3.0            | 7.3              | 43.6             | nd          | 53.6            | 13.8x10 <sup>3</sup> (±0.69x10 <sup>3</sup> ) | 5.1 (±0.3, 1)                                                                    | -                            |
|                                                | <b>Endmember</b> | <b>0</b> | <b>600</b> | <b>6.09</b> | <b>3.3</b>     | <b>8.0</b>       | <b>48.5</b>      | nd          | <b>58.8</b>     | 15.5x10 <sup>3</sup>                          | <b>11</b>                                                                        | <b>nd*</b>                   |
| Bottom Seawater                                |                  | 53.5     | 538        | ~8          | 0              | 0                | 2.18             | 0           | 0               | 0.1                                           | 0 (nd‡)                                                                          | -                            |
| <b>VON DAMM (2300m, 18°22.6'N–81°47.9'W)</b>   |                  |          |            |             |                |                  |                  |             |                 |                                               |                                                                                  |                              |
| <i>Endmember Fluids</i>                        |                  |          |            |             |                |                  |                  |             |                 |                                               |                                                                                  |                              |
| East Summit (226°C)                            | J2-616-IGT8      | 2.43     | 653        | 5.56        | 18.3           | 3.1              | 2.75             | nd          | 2.71            | 17.1 (±0.85)                                  | 21 (±8.0, 2)                                                                     | -                            |
|                                                | <b>Endmember</b> | <b>0</b> | <b>658</b> | <b>5.56</b> | <b>19.2</b>    | <b>3.2</b>       | <b>2.78</b>      | nd          | <b>2.84</b>     | 17.9                                          | <b>22</b>                                                                        | <b>1.6x10<sup>6</sup></b>    |
| <i>Low Temperature &amp; Mixed Fluids</i>      |                  |          |            |             |                |                  |                  |             |                 |                                               |                                                                                  |                              |
| Arrow Loop #1 (134°C)                          | J2-616-IGT6      | 18.5     | <b>615</b> | <b>5.86</b> | <b>10.8</b>    | <b>1.9</b>       | <b>2.27</b>      | nd          | <b>1.73</b>     | 14.4 (±0.72)                                  | <b>91.6</b> (±6.3, 3)                                                            | <b>1.8x10<sup>6</sup></b>    |
| White Castle (151°C)                           | J2-616-IGT1      | 13.5     | <b>631</b> | <b>5.77</b> | <b>13.1</b>    | <b>2.1</b>       | <b>2.51</b>      | nd          | <b>2.08</b>     | 14.5 (±0.73)                                  | <b>152</b> (±9.2, 3)                                                             | <b>2.0x10<sup>6</sup></b>    |
| Ginger Castle (128°C)                          | J2-617-IGT4      | 18.0     | <b>624</b> | <b>6.06</b> | <b>11.3</b>    | <b>2.1</b>       | <b>2.35</b>      | nd          | <b>1.91</b>     | 15.6 (±0.78)                                  | <b>104</b> (±11, 3)                                                              | <b>2.0x10<sup>6</sup></b>    |
| Ravelin #1 (145°C)                             | J2-617-IGT2      | 16.8     | 618        | 5.93        | 13.1           | 1.7              | 2.40             | nd          | 1.98            | 14.2 (±0.71)                                  | 57.4 (±4.4, 2)                                                                   | -                            |
|                                                | J2-617-IGT6      | 15.0     | <b>625</b> | <b>5.83</b> | <b>13.4</b>    | <b>2.5</b>       | <b>2.52</b>      | nd          | <b>2.06</b>     | 14.6 (±0.73)                                  | <b>52.5</b> (±3.0, 3)                                                            | <b>2.3x10<sup>6</sup></b>    |
| Ravelin #2 (116°C)                             | J2-621-IGT2      | 13.4     | <b>640</b> | <b>5.88</b> | <b>13.6</b>    | <b>2.2</b>       | <b>1.98</b>      | nd          | <b>2.14</b>     | nd                                            | <b>206</b> (±10, 2)                                                              | <b>1.9x10<sup>6</sup></b>    |
|                                                | J2-621-IGT8      | 22.0     | 609        | 6.12        | 10.9           | 1.9              | 1.88             | nd          | 1.73            | 11.2 (±0.56)                                  | 154 (±11, 2)                                                                     | -                            |
| West Summit (126°C)                            | J2-621-IGT1      | 24.0     | 607        | 6.00        | 9.9            | 1.9              | 2.08             | nd          | 1.64            | 14.1 (±0.71)                                  | 142 (±7.1, 2)                                                                    | -                            |
|                                                | J2-621-IGT4      | 23.2     | <b>611</b> | <b>6.01</b> | <b>9.9</b>     | <b>1.8</b>       | <b>2.11</b>      | nd          | <b>1.67</b>     | 13.7 (±0.68)                                  | <b>138</b> (±6.9, 2)                                                             | <b>1.7x10<sup>6</sup></b>    |
| Bottom Seawater                                |                  | 52.4     | 545        | ~8          | 0              | 0                | 2.2              | 0           | 0               | 0.1                                           | 0 (nd‡)                                                                          | -                            |
| <b>PICCARD (4960m, 18°32.8'N–81°43.1'W)</b>    |                  |          |            |             |                |                  |                  |             |                 |                                               |                                                                                  |                              |
| <i>Endmember Fluids</i>                        |                  |          |            |             |                |                  |                  |             |                 |                                               |                                                                                  |                              |
| Beebe 3 (397°C)                                | J2-619-IGT4      | 1.26     | 363        | 3.23        | 20.2           | 11.9             | 25.7             | nd          | 0.120           | 33.6 (±2.2)                                   | 10.2 (±2.3, 3)                                                                   | -                            |
|                                                | J2-619-IGT8      | 1.59     | 363        | 3.17        | 20.1           | 11.4             | 25.0             | nd          | 0.119           | 33.8 (±1.7)                                   | 15.5 (±8.4, 3)                                                                   | -                            |
|                                                | <b>Endmember</b> | <b>0</b> | <b>358</b> | <b>3.17</b> | <b>20.7</b>    | <b>12.0</b>      | <b>26.0</b>      | nd          | <b>0.123</b>    | 34.7                                          | <b>13.2</b>                                                                      | <b>5.3x10<sup>2</sup></b>    |
| Beebe Woods (354°C)                            | J2-618-IGT2      | 2.95     | nd         | 3.24        | 19.6           | 11.6             | 24.5             | nd          | 0.122           | 35.1 (±1.8)                                   | 9.9 (±0.49, 2)                                                                   | -                            |
|                                                | J2-618-IGT8      | 2.97     | 365        | 3.18        | 19.4           | 11.6             | 24.7             | nd          | 0.120           | 35.0 (±1.8)                                   | 10.1 (±0.81, 3)                                                                  | -                            |
|                                                | <b>Endmember</b> | <b>0</b> | <b>354</b> | <b>3.18</b> | <b>20.7</b>    | <b>12.3</b>      | <b>25.9</b>      | nd          | <b>0.128</b>    | 37.2                                          | <b>10.6</b>                                                                      | <b>1.3x10<sup>4</sup></b>    |
| <i>Mixed Fluids</i>                            |                  |          |            |             |                |                  |                  |             |                 |                                               |                                                                                  |                              |
| Hot Chimlet #1 (149°C)                         | J2-619-IGT6      | 35.4     | 487        | 5.06        | 2.0            | 2.7              | 9.09             | nd          | 0.054           | 14.2 (±0.71)                                  | 1.76x10 <sup>3</sup> (±0.11x10 <sup>3</sup> , 3)                                 | -                            |
|                                                | J2-619-IGT3      | 33.4     | <b>479</b> | <b>4.97</b> | <b>2.1</b>     | <b>2.3</b>       | <b>10.1</b>      | nd          | <b>0.060</b>    | 16.9 (±0.85)                                  | <b>1.76x10<sup>3</sup></b> (±0.21x10 <sup>3</sup> , 3) <b>6.1x10<sup>5</sup></b> | -                            |
| Hot Chimlet #2 (95°C)                          | J2-620-IGT4      | 45.4     | 527        | <b>5.67</b> | <b>0.70</b>    | <b>0.98</b>      | <b>4.89</b>      | nd          | <b>0.022</b>    | 6.2 (±0.31)                                   | <b>430</b> (±22, 2)                                                              | <b>2.2x10<sup>5</sup></b>    |
|                                                | J2-620-IGT8      | 47.8     | <b>524</b> | 5.94        | 0.53           | 0.79             | 4.08             | nd          | 0.016           | 2.5 (±0.33)                                   | 292 (±15, 2)                                                                     | -                            |
| Shrimp Gulley (45°C)                           | J2-618-IGT1      | 47.4     | <b>530</b> | <b>5.95</b> | <b>0.12</b>    | <b>0.72</b>      | <b>3.39</b>      | nd          | <b>0.011</b>    | 2.9 (±0.58)                                   | <b>50.4</b> (±2.5, 3)                                                            | <b>3.9x10<sup>4</sup></b>    |
|                                                | J2-618-IGT3      | 48.9     | 533        | 5.94        | 0.13           | 1.0              | 3.64             | nd          | 0.011           | 0.53 (±0.48)                                  | 44.0 (±7.1, 3)                                                                   | -                            |
| Near Shrimp Gulley (111°C)                     | J2-620-IGT1      | 42.4     | <b>515</b> | <b>5.49</b> | <b>0.41</b>    | <b>1.7</b>       | <b>5.95</b>      | nd          | <b>0.025</b>    | 7.7 (±0.85)                                   | <b>144</b> (±7.2, 2)                                                             | <b>1.2x10<sup>5</sup></b>    |
|                                                | J2-620-IGT2      | 44.8     | 519        | 5.58        | 0.28           | 1.4              | 5.56             | nd          | 0.021           | 3.4 (±0.76)                                   | 83.4 (±4.2, 2)                                                                   | -                            |
| Bottom Seawater                                |                  | 52.4     | 545        | ~8          | 0              | 0                | 2.2              | 0           | 0               | 0.1                                           | 0 (nd‡)                                                                          | -                            |
